# Supplementary material for: Macroscale synthesis of vertical MoS2 -WS2 superlattice heterostructures using Metal-Organic Vapor Deposition
Source: Research Square preprint supplement (doi:10.21203/rs.3.rs-8741966/v1), 2026-02-17
Supplement: Supplementary file 1 [file 6eb9c8abe754bb1e8577b70c.docx]

**Supplementary Information**

**Macroscale synthesis of vertical MoS2-WS2 superlattice heterostructures using Metal-Organic Vapor Deposition**

Nikolas Dominik1,#, Sebastian Klenk1,#, Cormac Ó Coileáin1, Martina Schenkel2, Rik Hooijer3, Rita Tilmann4, Tanja Stimpel‑Lindner1, Paul Seifert1, Markus Boese2, Erkan Aydin3, Georg S. Duesberg1*

1 Institute of Physics & SENS Research Centre, Department of Electrical Power Systems and Information Technology, University of the Bundeswehr Munich, Werner-Heisenberg-Weg 39, 85577 Neubiberg, Germany

2 Carl Zeiss Microscopy GmbH, Carl-Zeiss-Straße 22, 73447 Oberkochen, Germany

3 Department of Chemistry and Center for NanoScience (CeNS), Ludwig-Maximilians-Universität München, Butenandtstraße 5–13, 81377 Munich, Germany

4 MCA, IMEC, Kapeldreef 75, 3001, Leuven, Belgium

**Atomic Force Microscopy (AFM)**

HS_thick:


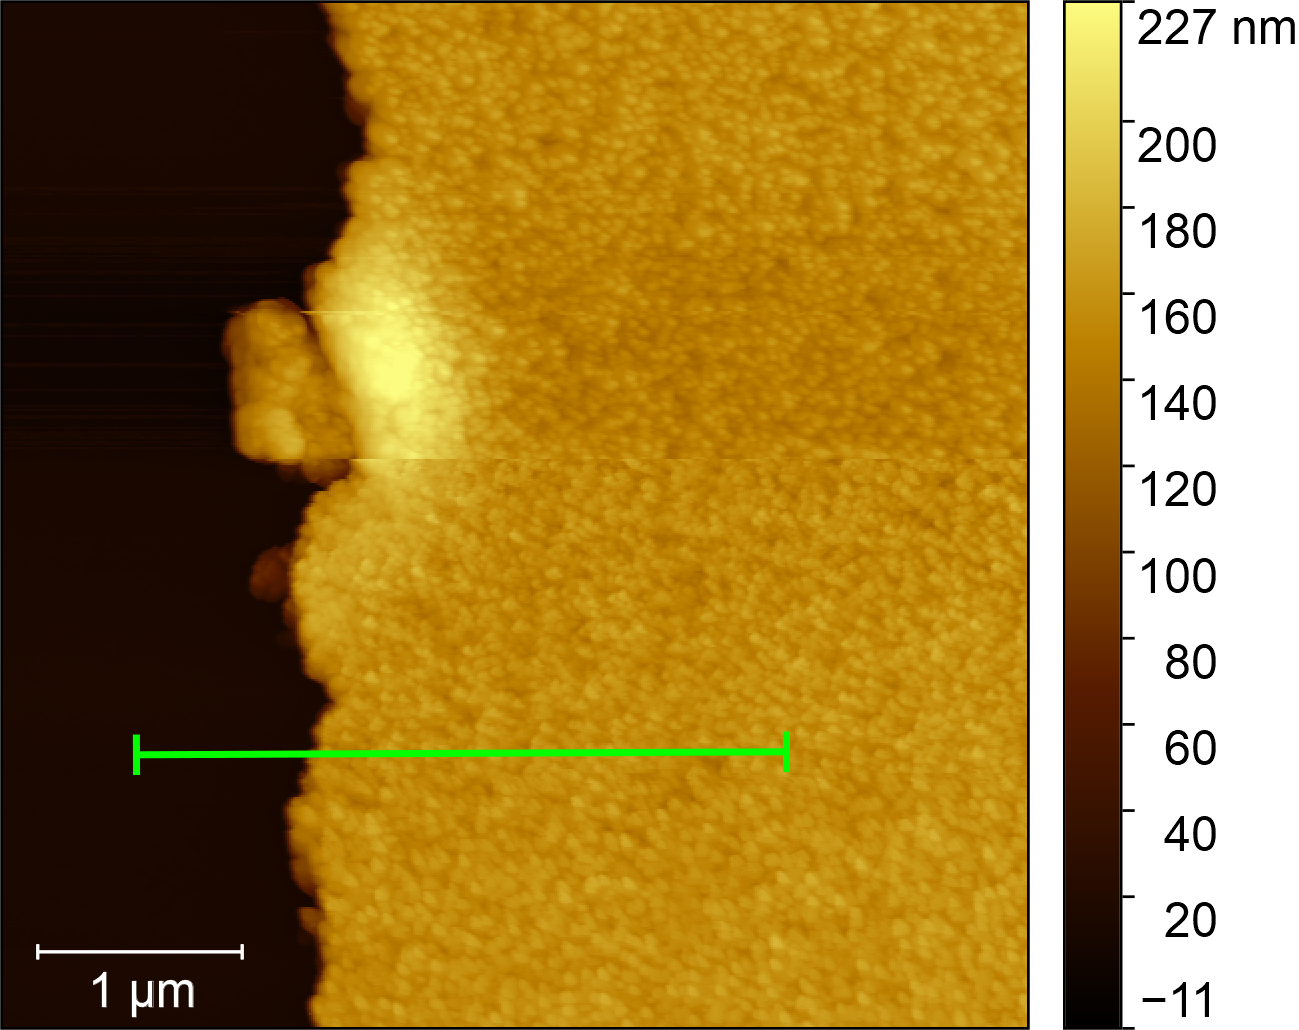


Figure S1: 5 x 5 µm² AFM scan of HS_thick. The RMS roughness of the heterostructure material is 7.2 nm. The average line profile below (Figure S2) is highlighted in green.


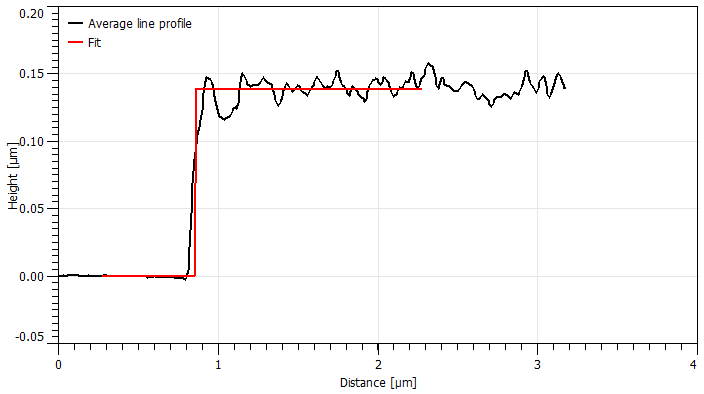


Figure S2: Line profile plot of HS_thick. The extraction region is highlighted in green in Figure S3. The height fit is plotted in red. The fitted step height is 138 ± 8 nm.

HS_thin:


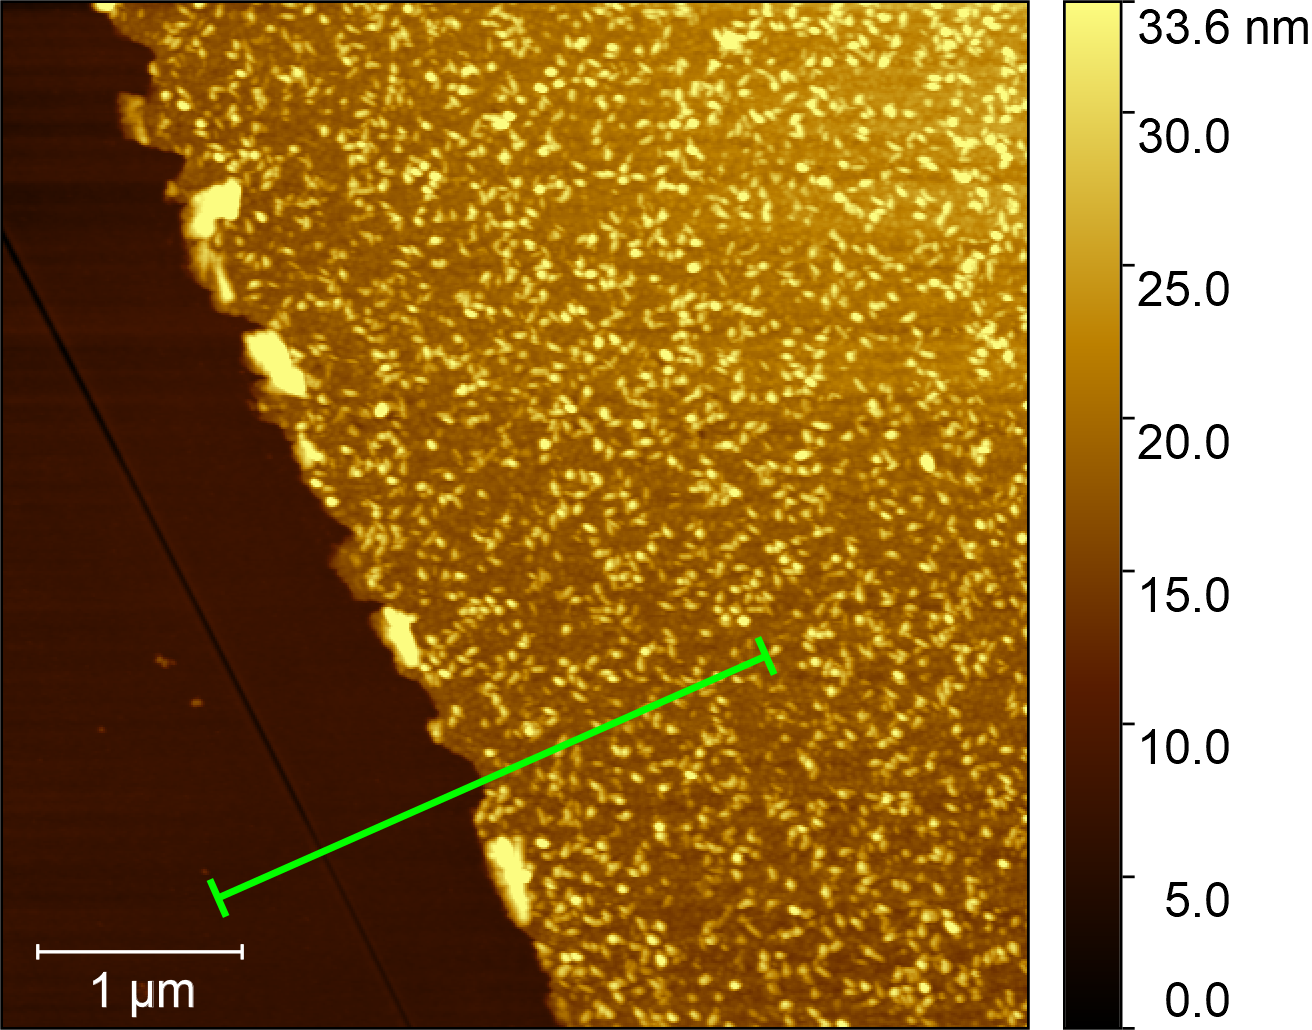


Figure S3: 5 x 5 µm² AFM scan of HS_thin. The RMS roughness of the heterostructure material is 4.3 nm. This increased value can be explained by the emergence of a seeding layer. The average line profile below (Figure S4) is highlighted in green.


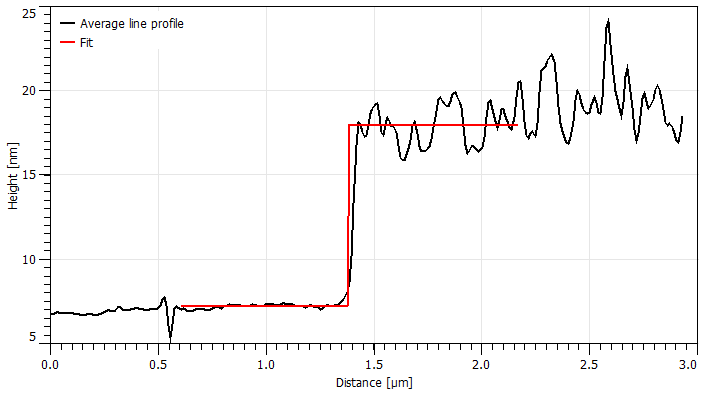


Figure S4: Line profile plot of HS_thin. The extraction region is highlighted in green in Figure S3. The height fit is plotted in red. The fitted step height is 10.8 ± 1.2 nm.

**(Scanning) Transmission Electron Microscopy ((S)TEM) and Energy-Dispersive X-ray spectroscopy (EDX)**

HS_thick


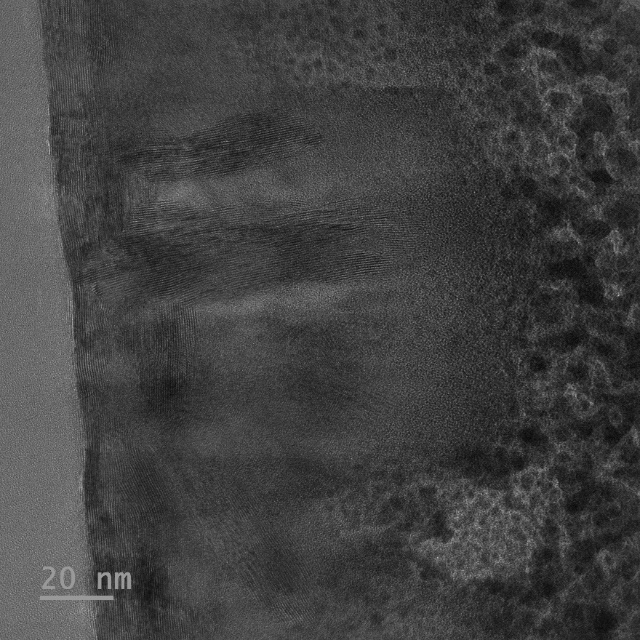

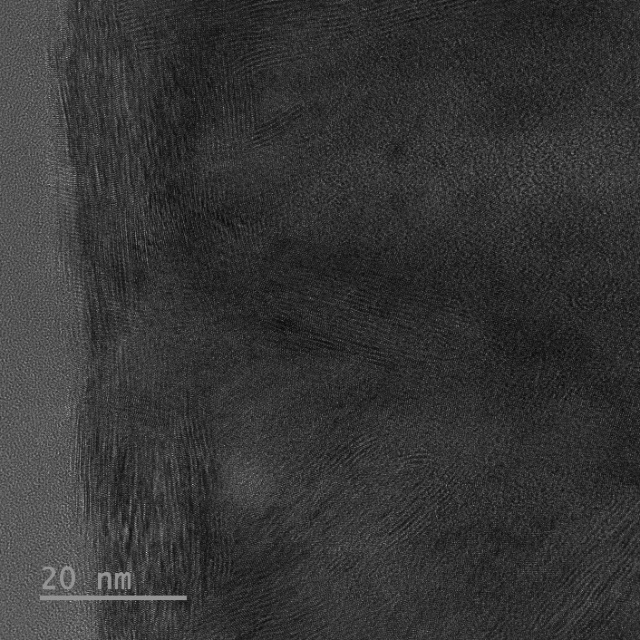


b)

a)

d)

c)


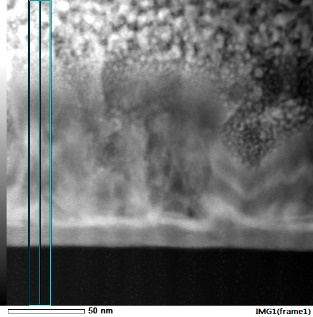


Figure S5: a), b) TEM images of HS_thick. c) STEM image of HS_thick, red mark shows the selected area depicted in d) elemental distribution (EDX) of Mo and W in the selected area.

HS_thin

b)

a)


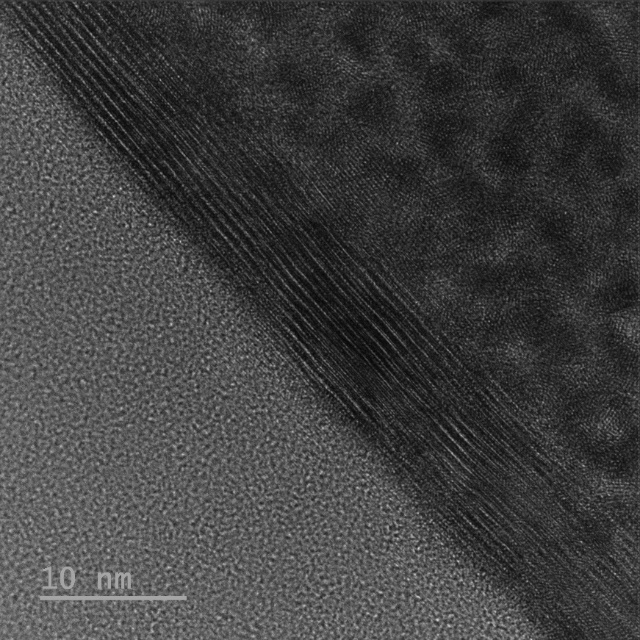

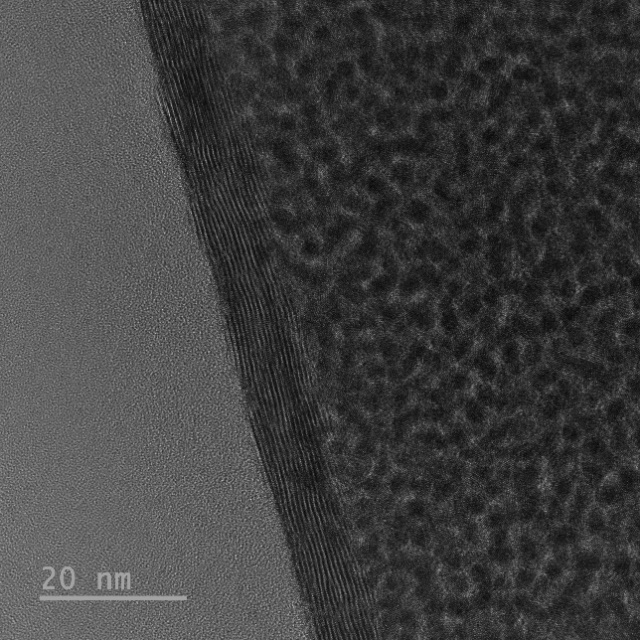


c)


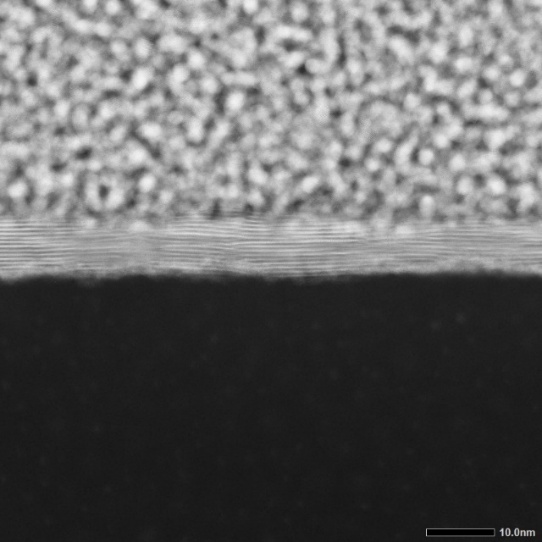


d)

e)


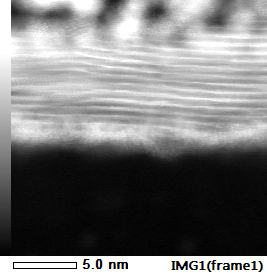


Figure S6: a), b) TEM images of HS_thin, c), d) STEM image of HS_thin, e) elemental distribution (EDX) of Mo and W for the entire area of d).

**Raman spectroscopy**

| **No.** | **Mode** | **Material** |  | |  | |
| --- | --- | --- | --- | --- | --- | --- |
|  |  |  | **HS_thick** | **HS_thin** | **HS_thick** | **HS_thin** |
| **1** |  | MoS2 | 285.6 | 286.5 |  |  |
| **2** |  | WS2 | 295.0 | 294.3 |  |  |
| **3** |  | WS2 | 311.6 | 313.3 |  |  |
| **4** |  | WS2 | 320.9 | 320.2 |  |  |
| **5** |  | WS2 | 349.5 | 348.5 |  |  |
| **6** |  | WS2 | 356.3 | 355.8 | -1.4 | -2.3 |
| **7** |  | MoS2 | 381.9 | 382.2 | -6.2 | -6.2 |
| **8** |  | MoS2 | 406.9 | 405.9 |  |  |
| **9** |  | WS2 | 419.0 | 418.0 | -9.9 | -12.5 |
| **10** |  | MoS2 | 450.9 | 449.5 | -7.6 |  |
| **11** |  | MoS2 | 462.9 | 463.4 |  |  |

Table S1: Identified Raman modes of MoS₂ and WS₂ extracted from fitted average spectra of heterostructure regions with differing thickness (HS_thick and HS_thin). The parameters and represent the peak position and the BWF coupling coefficient, respectively. Spectra were calibrated to the Si TO mode at 520.0 cm⁻¹ before fitting routine.


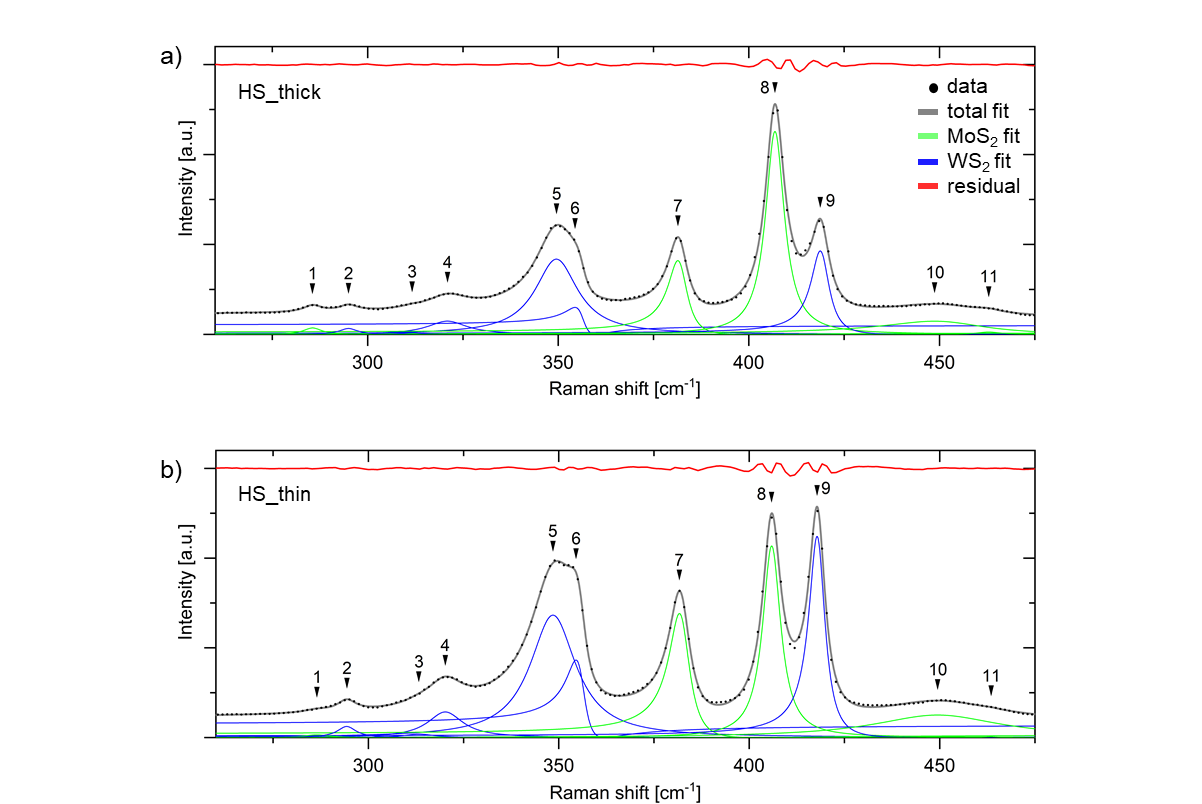


Figure S7: Average spectra of respective quadratic Raman map of a) HS_thick and b) HS_thin. The green fits correspond to MoS2 modes, the blue fit to WS2 modes. The red plot is the residual of the fit with R²(HS_thick) = 99.86 % and R²(HS_thin) = 99.88 %.

**X-ray Photoelectron Spectroscopy (XPS) and Angle-Resolved X-ray Photoelectron Spectroscopy (ARXPS)**

Figure S8: XPS Survey spectrum for HS_thick.


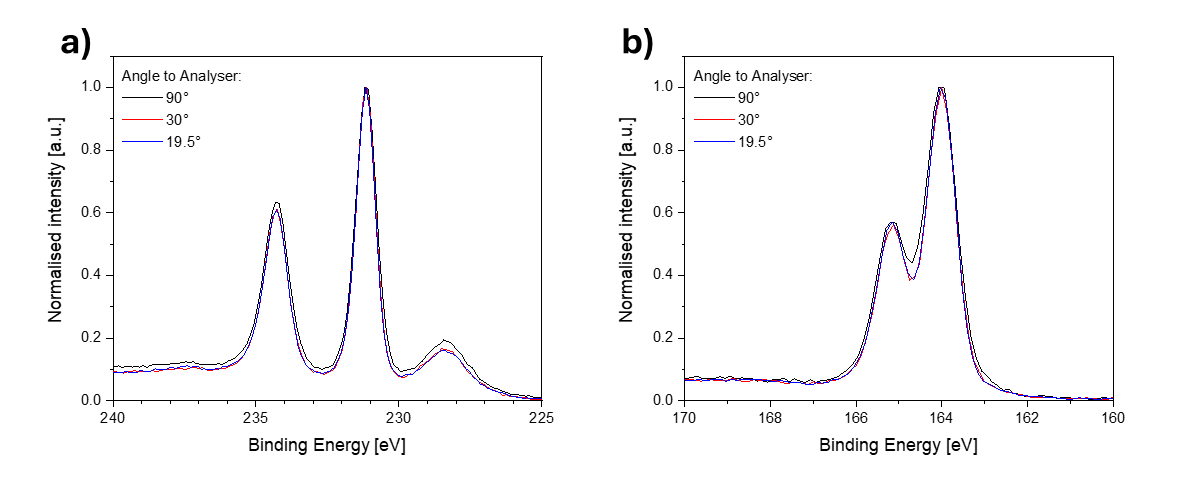


Figure S9: Normalised ARXPS single spectra for a) Mo 3d and b) S 2p for three different angles of HS_thick to the analyser.

**Grazing Incidence Wide-Angle X-ray Scattering (GIWAXS):**


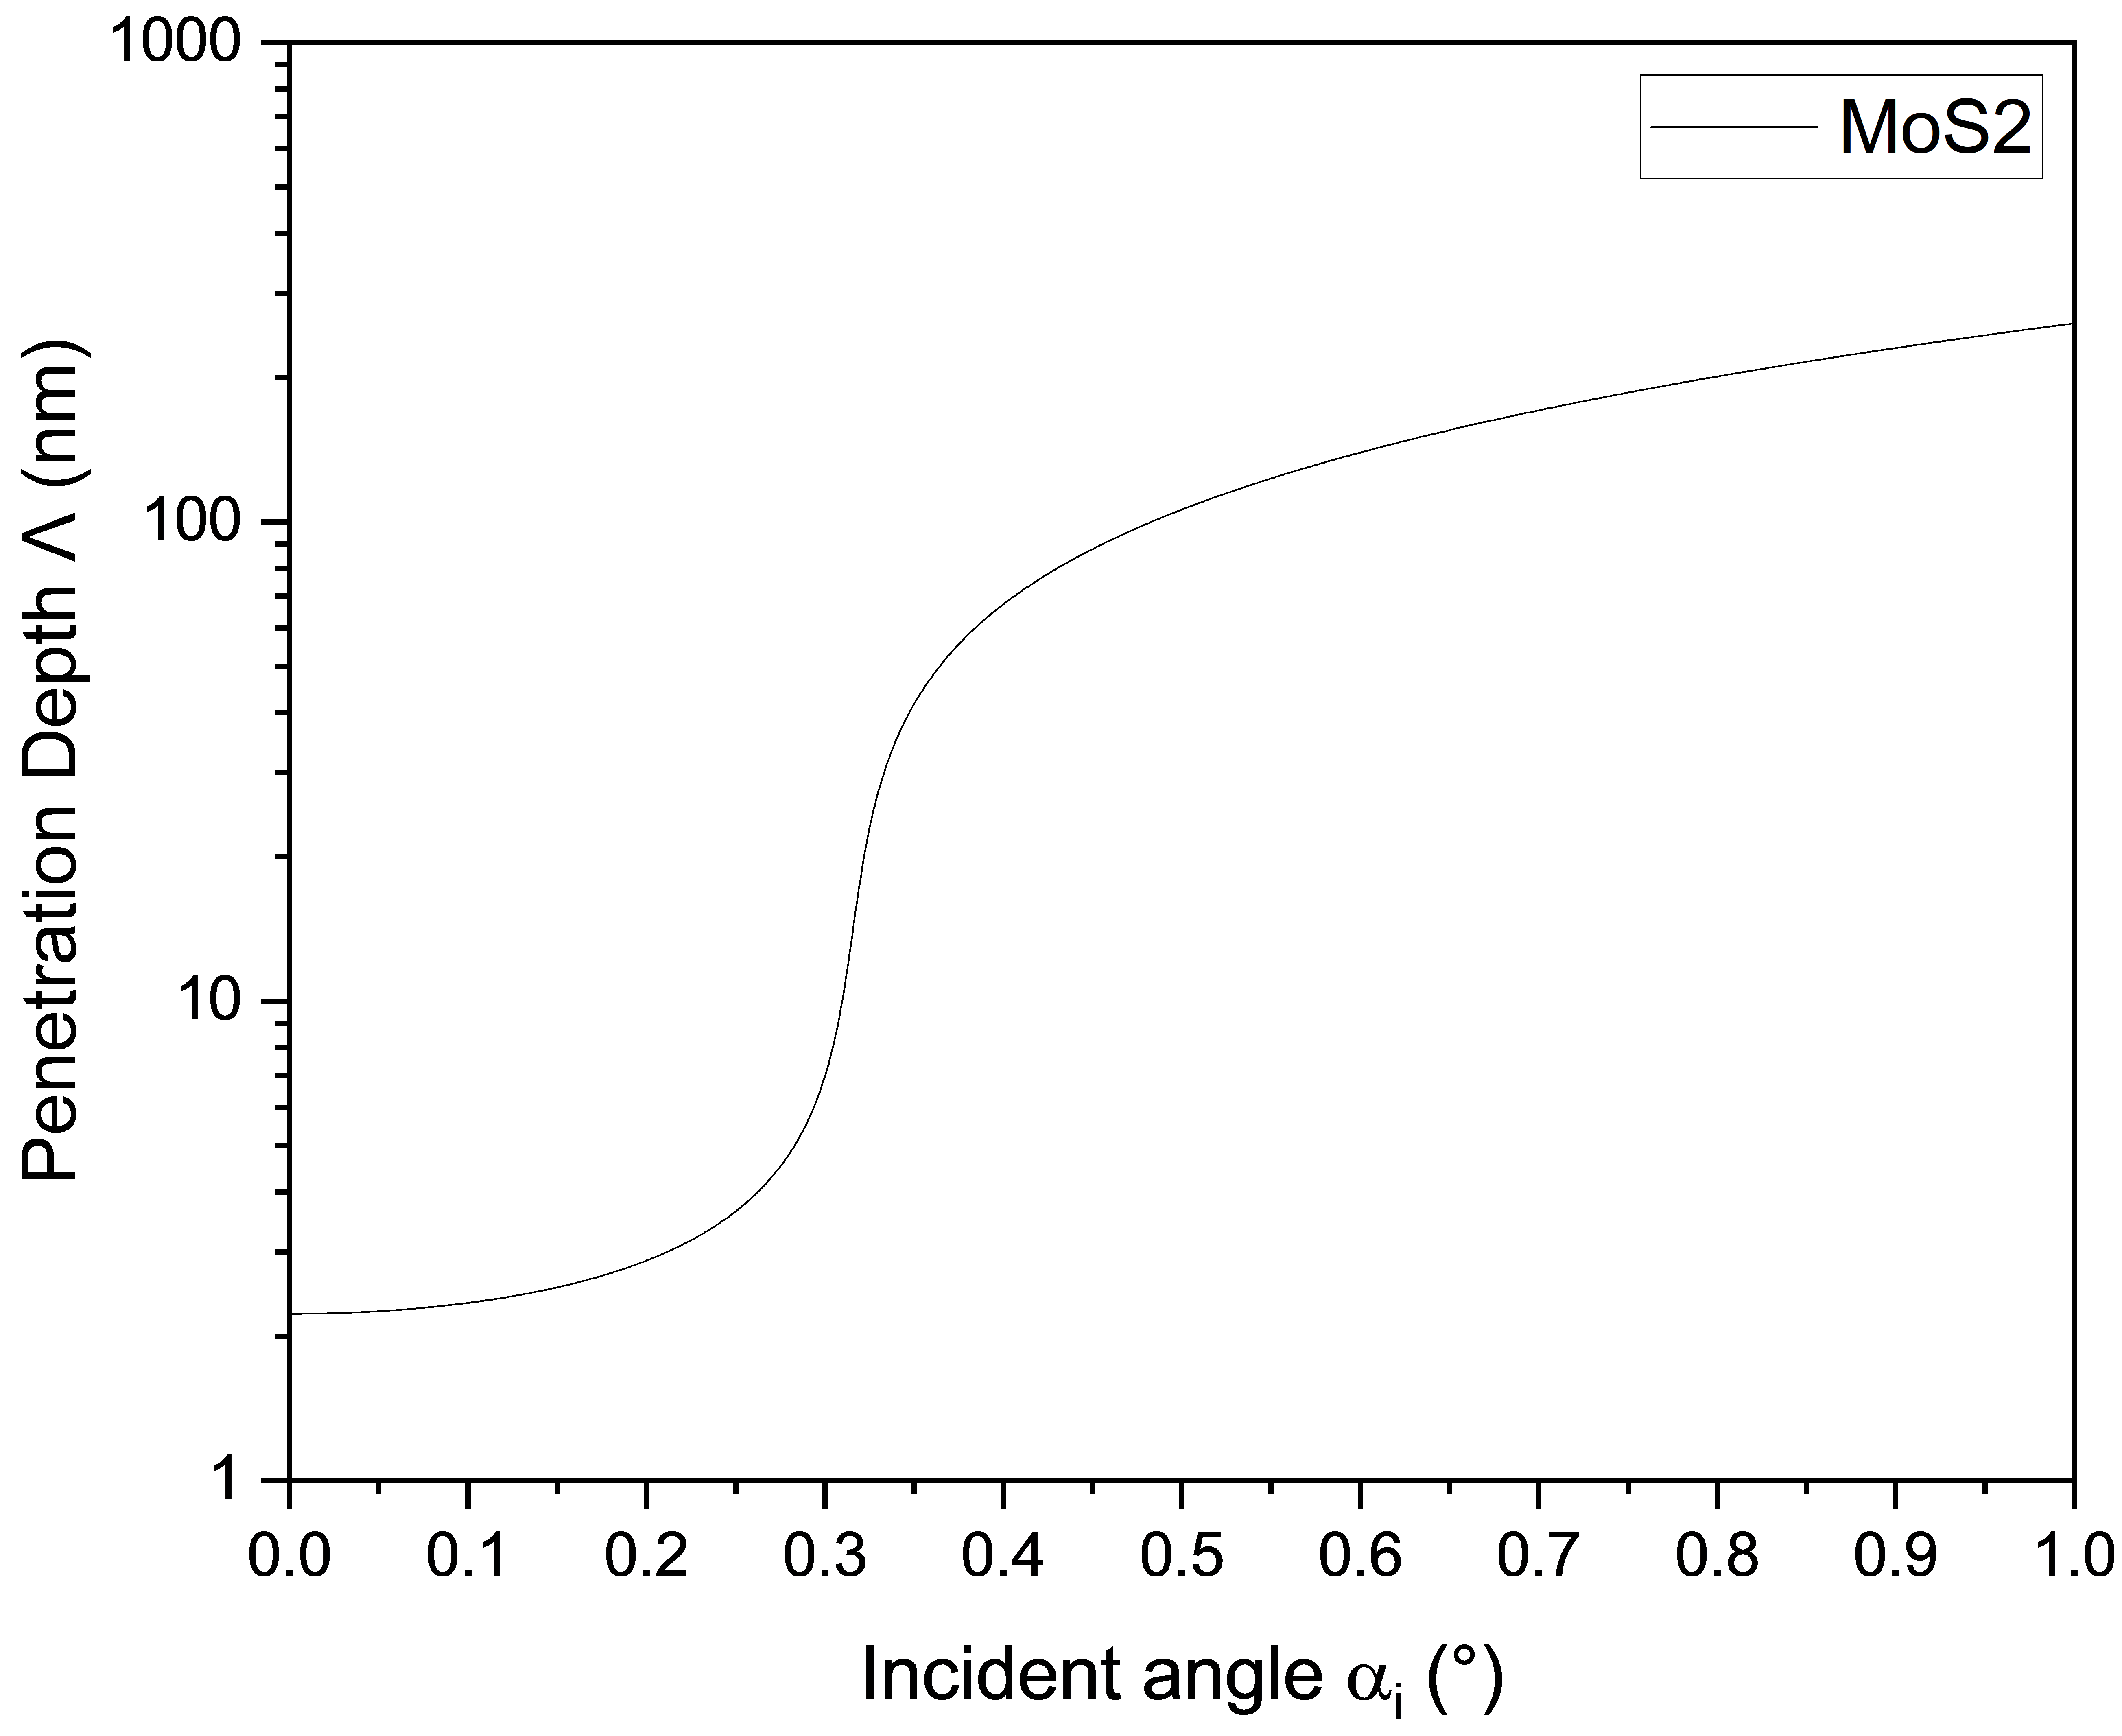


Figure S10: GIWAXS penetration depth depending on incident angle for MoS2.

|  |  | (S1) |
| --- | --- | --- |

Equation S1 shows the dependence of the penetration depth Λ on the wavenumber k, the X-ray incident angle αi, the critical angle αc and the imaginary part of the index of refraction β.
